# Supplementary material for: Alterations in Healthy Adult Canine Faecal Microbiome and Selected Metabolites as a Result of Feeding a Commercial Complete Synbiotic Diet with Enterococcus faecium NCIMB 10415
Source: MDPI journal article supplement (doi:10.3390/ani13010144), 2022-12-30
Supplement: s1 [file s1]

**Table S1.** All recruited dogs.

| Laboratory references |                             |                 |             |                  |                      | 6.50-<br>18.10   | 3.2-<br>12.1             | 0.0-<br>1.2            | 1.00-<br>4.80            | 0.00-<br>1.20            | 0.00-<br>0.05          | 4.6-<br>8.4         | 200-<br>500               | 6-<br>102 | 19.8-<br>174 | 3.9-<br>6.55     | 3.3-<br>9.4   | 40-<br>130                | 3.50-<br>6.99        | 0-5                | 26-<br>44   | 2.20-<br>3.30    | 0.63-<br>1.05      | 0.91-<br>1.96      | 142-<br>154     | 3.8-<br>5.1        | 106-<br>123       | Role in study                                                                           |
|-----------------------|-----------------------------|-----------------|-------------|------------------|----------------------|------------------|--------------------------|------------------------|--------------------------|--------------------------|------------------------|---------------------|---------------------------|-----------|--------------|------------------|---------------|---------------------------|----------------------|--------------------|-------------|------------------|--------------------|--------------------|-----------------|--------------------|-------------------|-----------------------------------------------------------------------------------------|
| Dog                   | Breed                       | Sex             | Age [years] | Body weight [kg] | Body condition score | WBC [ $10^9$ /L] | Neutrophils [ $10^9$ /L] | Monocytes [ $10^9$ /L] | Lymphocytes [ $10^9$ /L] | Eosinophils [ $10^9$ /L] | Basophils [ $10^9$ /L] | RBC [ $10^{12}$ /L] | Thrombocytes [ $10^9$ /L] | ALT [U/L] | ALP [U/L]    | Glucose [mmol/L] | UREA [mmol/L] | Creatinine [ $\mu$ mol/L] | Cholesterol [mmol/L] | Bilirubin [mmol/L] | Albumin g/L | Calcium [mmol/L] | Magnesium [mmol/L] | Phosphate [mmol/L] | Sodium [mmol/L] | Potassium [mmol/L] | Chloride [mmol/L] |                                                                                         |
| 1                     | Giant Schnauzer             | ME              | 3.0         | 46.3             | 5/9                  | 9.86             | 5.79                     | 0.39                   | 3.07                     | 0.57                     | 0.02                   | 6.73                | 188 <sup>d</sup>          | 34        | 68           | 5.1              | 5.3           | 91                        | 5.86                 | 2                  | 35          | 2.58             | 0.76               | 1.1                | 148             | 4.42               | 115               | Completed study                                                                         |
| 2                     | Cocker Spaniel              | ME              | 2.8         | 15.4             | 6/9                  | 10.99            | 6.81                     | 0.59                   | 3.32                     | 0.25                     | 0.01                   | 6.57                | 187 <sup>d</sup>          | 29        | 54           | 4.7              | 6.0           | 80                        | 7.23                 | 2                  | 36          | 2.82             | 0.73               | 1.2                | 148             | 4.49               | 112               | Excluded due to diarrhoea.                                                              |
| 3                     | Broholmer                   | ME              | 2.5         | 67               | 4/9                  | 6.32             | 4.65                     | 0.27                   | 1.24                     | 0.13                     | 0.01                   | 6.71                | 237                       | 23        | 108          | 5.2              | 4.8           | 88                        | 6.92                 | 1                  | 34          | 2.61             | 0.73               | 1.3                | 146             | 4.63               | 115               | Excluded due to persistent weight loss                                                  |
| 4                     | Broholmer                   | FE              | 4.0         | 43.5             | 5/9                  | 7.69             | 4.69                     | 0.60                   | 1.96                     | 0.41                     | 0.01                   | 6.32                | 366                       | 47        | 223          | 4.8              | 5.1           | 76                        | 10.04                | 2                  | 37          | 2.64             | 0.99               | 1.4                | 147             | 4.88               | 114               | Completed study                                                                         |
| 5                     | Mixed breed                 | MN              | 6.0         | 26.2             | 5/9                  | 7.19             | 4.66                     | 0.35                   | 1.57                     | 0.59                     | 0.00                   | 7.02                | 166 <sup>e</sup>          | 192       | 41           | 5.4              | 5.1           | 80                        | 6.49                 | 1                  | 35          | 2.65             | 0.82               | 1.4                | 148             | 4.35               | 114               | Completed study                                                                         |
| 6                     | Field Trail Cocker Spaniel  | MN              | 5.8         | 26.5             | 6/9                  | 11.89            | 6.59                     | 0.68                   | 3.41                     | 1.18                     | 0.02                   | 6.34                | 299                       | 49        | 39           | 4.9              | 15.0          | 83                        | 2.90                 | 0                  | 30          | 2.70             | 0.79               | 1.6                | 146             | 4.69               | 116               | Completed study                                                                         |
| 7                     | Labrador retriever          | ME              | 5.5         | 32.1             | 4/9                  | 5.64             | 3.91                     | 0.29                   | 1.21                     | 0.23                     | 1.01                   | 6.26                | 259                       | 50        | 20           | 5.7              | 5.8           | 87                        | 3.65                 | 2                  | 35          | 2.56             | 0.83               | 1.0                | 145             | 4.70               | 115               | Completed study                                                                         |
| 8                     | Berger Blanc Suisse         | ME              | 3.1         | 33.0             | 4/9                  | 5.14             | 2.85                     | 0.36                   | 1.56                     | 0.35                     | 0.02                   | 6.62                | 168 <sup>e</sup>          | 119       | 33           | 5.0              | 8.3           | 126                       | 6.65                 | 1                  | 33          | 2.78             | 0.85               | 1.4                | 150             | 4.19               | 116               | Completed study                                                                         |
| 9                     | Border Collie               | FE              | 3.1         | 18.1             | 6/9                  | 6.09             | 4.26                     | 0.32                   | 1.04                     | 0.47                     | 0.00                   | 6.38                | 318                       | 49        | 62           | 6.0              | 5.8           | 104                       | 6.39                 | 1                  | 33          | 2.36             | 0.85               | 1.1                | 150             | 4.15               | 119               | Completed study                                                                         |
| 10                    | Mixed breed                 | ME              | 4.3         | 27.2             | 6/9                  | 8.57             | 7.01                     | 0.28                   | 1.18                     | 0.07                     | 0.02                   | 7.10                | 336                       | 34        | 53           | 5.7              | 8.3           | 81                        | 5.29                 | 2                  | 38          | 2.71             | 0.81               | 1.5                | 147             | 4.48               | 112               | Excluded due to diarrhoea                                                               |
| 11                    | West Highland White Terrier | ME              | 7.3         | 10.9             | 5/9                  | 8.12             | 5.55                     | 0.28                   | 1.86                     | 0.42                     | 0.01                   | 6.69                | 353                       | 32        | 96           | 5.0              | 4.8           | 73                        | 5.75                 | 1                  | 31          | 2.35             | 0.70               | 1.2                | 149             | 4.61               | 113               | Completed study                                                                         |
| 12                    | Mixed breed                 | MN              | 3.9         | 45.8             | 4/9                  | 6.22             | 3.51                     | 0.39                   | 1.68                     | 0.61                     | 0.02                   | 7.1                 | 222                       | 28        | 68           | 4.2              | 6.6           | 83                        | 5.37                 | 2                  | 37          | 2.71             | 0.80               | 1.1                | 145             | 4.28               | 114               | Excluded at owners request due to increased appetite and decreased defecation frequency |
| 13 <sup>a</sup>       | Czechoslovakian Wolfdog     | FE              | 2.1         | 30               | 5/9                  | 5.99             | 3.71                     | 0.24                   | 1.75                     | 0.26                     | 0.03                   | 7.63                | 270                       | 36        | 31           | 5.1              | 7.3           | 98                        | 5.17                 | 1                  | 37          | 2.63             | 1.02               | 1.2                | 148             | 4.33               | 117               | Excluded at owners request due to unconfirmed weight loss                               |
| 14 <sup>a</sup>       | Czechoslovakian Wolfdog     | FE              | 2.6         | 29.8             | 5/9                  | 7.59             | 4.63                     | 0.33                   | 1.95                     | 0.65                     | 0.02                   | 7.59                | 359                       | 37        | 76           | 4.8              | 5.5           | 92                        | 4.50                 | 1                  | 33          | 2.65             | 0.88               | 1.0                | 147             | 4.17               | 115               | Excluded at owners request due to unconfirmed weight loss                               |
| 15                    | Greyhound                   | MN              | 3.1         | 26               | 4/9                  | 5.54             | 3.71                     | 0.51                   | 1.26                     | 0.03                     | 0.03                   | 7.96                | 146 <sup>e</sup>          | 51        | 70           | 5.6              | 4.6           | 135                       | 2.83                 | 1                  | 33          | 2.62             | 0.89               | 1.3                | 150             | 4.08               | 117               | Completed study                                                                         |
| 16                    | Border Collie               | FE              | 4.5         | 17.6             | 5/9                  | 4.85             | 3.15                     | 0.26                   | 1.17                     | 0.23                     | 0.02                   | 5.90                | 296                       | 33        | 81           | 4.3              | 5.8           | 96                        | 5.57                 | 2                  | 27          | 2.33             | 0.7                | 1.0                | 148             | 4.56               | 115               | Completed study                                                                         |
| 17                    | Mixed breed                 | MN <sup>f</sup> | 3.1         | 36.8             | 5/9                  | 6.21             | 2.93                     | 0.30                   | 2.20                     | 0.75                     | 0.03                   | 7.23                | 263                       | 38        | 310          | 4.9              | 5.5           | 102                       | 8.13                 | 1                  | 30          | 2.47             | 0.68               | 1.4                | 145             | 5.02               | 111               | Completed study                                                                         |

|                 |                       |    |     |      |     |       |      |      |      |      |      |      |                  |    |     |     |      |     |      |   |    |      |      |     |     |      |     |                                                                    |
|-----------------|-----------------------|----|-----|------|-----|-------|------|------|------|------|------|------|------------------|----|-----|-----|------|-----|------|---|----|------|------|-----|-----|------|-----|--------------------------------------------------------------------|
| e1 <sup>b</sup> | Collie                | FE | 6.0 | 30.8 | 6/9 | 9.42  | 7.75 | 0.41 | 1.05 | 0.21 | 0    | 5.41 | 377              | 69 | 47  | 6.0 | 4.5  | 68  | 7.38 | 0 | 30 | 2.65 | 1.37 | 1.3 | 147 | 4.20 | 113 | Excluded due to hypermagnesemia                                    |
| e2 <sup>b</sup> | Cocker Spaniel        | ME | 6.1 | 16.9 | 5/9 | 8.19  | 6.57 | 0.27 | 1.03 | 0.30 | 0.01 | 7.00 | 197 <sup>d</sup> | 32 | 105 | 4.1 | 6.0  | 74  | 5.89 | 2 | 35 | 2.65 | 1.39 | 1.2 | 148 | 4.21 | 112 | Excluded due to hypermagnesemia                                    |
| e3 <sup>b</sup> | Collie                | FE | 3.1 | 18.6 | 5/9 | 7.59  | 5.86 | 0.43 | 1.07 | 0.22 | 0.01 | 5.98 | 196 <sup>e</sup> | 53 | 22  | 4.5 | 13.2 | 174 | 7.40 | 0 | 36 | 2.97 | 1.41 | 1.1 | 152 | 4.26 | 111 | Excluded due to hypermagnesemia and azotemia                       |
| e4 <sup>b</sup> | Mixed breed           | ME | 2.1 | 29.2 | 6/9 | 7.20  | 3.82 | 0.22 | 1.66 | 1.51 | 0.00 | 6.72 | 179 <sup>e</sup> | 45 | 106 | 5.1 | 5.7  | 105 | 5.51 | 1 | 37 | 2.72 | 1.30 | 0.9 | 150 | 4.43 | 117 | Excluded due to hypermagnesemia, hypophosphatemia and eosinophilia |
| e5 <sup>b</sup> | Australian Cattle Dog | FE | 6.1 | 22.7 | 5/9 | 4.32  | 2.73 | 0.20 | 1.16 | 0.22 | 0.01 | 6.35 | 114 <sup>d</sup> | 31 | 123 | 4.8 | 2.8  | 81  | 5.73 | 1 | 36 | 2.84 | 1.35 | 1.0 | 150 | 4.32 | 115 | Excluded due to hypermagnesemia                                    |
| e6 <sup>c</sup> | Samoyed               | FE | 2.7 | 18.6 | 4/9 | 14.68 | 8.49 | 0.97 | 2.92 | 2.24 | 0.05 | 7.51 | 354              | 31 | 59  | 5.6 | 5.3  | 66  | 5.00 | 1 | 32 | 2.67 | 0.90 | 1.2 | 149 | 4.40 | 117 | Exclude due to eosinophilia                                        |
| e7 <sup>c</sup> | Samoyed               | FN | 2.7 | 20.0 | 4/9 | 11.7  | 6.51 | 0.47 | 2.21 | 2.49 | 0.01 | 5.29 | 276              | 42 | 72  | 4.3 | 6.5  | 83  | 3.81 | 2 | 32 | 2.58 | 0.92 | 1.4 | 150 | 4.33 | 116 | Exclude due to eosinophilia                                        |
| e8 <sup>c</sup> | Samoyed               | ME | 2.7 | 25.5 | 4/9 | 15.62 | 10.5 | 0.68 | 2.40 | 1.99 | 0.03 | 6.06 | 283              | 34 | 70  | 4.4 | 7.9  | 87  | 5.09 | 1 | 32 | 2.42 | 0.93 | 1.6 | 152 | 4.47 | 116 | Exclude due to eosinophilia                                        |
| e9 <sup>c</sup> | Swedish Lapphund      | ME | 2.7 | 12.9 | 4/9 | 9.56  | 5.96 | 0.42 | 1.96 | 1.17 | 0.03 | 6.20 | 260              | 40 | 805 | 5.6 | 5.5  | 95  | 3.71 | 3 | 34 | 2.45 | 0.79 | 1.5 | 149 | 4.57 | 117 | Excluded due to elevated alkaline phosphatase                      |

Green labeled dogs completed the study. Yellow labeled dogs were initially included in the study but excluded again during the study course. Red labeled dogs were recruited, but not included in the study. ME: male entire, MN: male neutered, FE: female entire. FN: female neutered.

<sup>a</sup> Same owner. Weight loss compared to time of inclusion was noted at a different set of scales by the owner, who hereafter requested withdrawal from the study.

<sup>b</sup> Same owner. No dogs were enrolled in the study due to hypermagnesemia.

<sup>c</sup> Same owner. No dogs were enrolled in the study due to eosinophilia (n=3) and elevated alkaline phosphatase (n=1).

<sup>d</sup> Thrombocyte aggregates, thrombocyte number interpreted as within reference levels.

<sup>e</sup> A few macrothrombocytes evaluated on blood smear.

<sup>f</sup> Chemically neutered 4 months prior to inclusion.
