# Supplementary material for: Alterations in Healthy Adult Canine Faecal Microbiome and Selected Metabolites as a Result of Feeding a Commercial Complete Synbiotic Diet with Enterococcus faecium NCIMB 10415
Source: MDPI journal article supplement (doi:10.3390/ani13010144), 2022-12-30
Supplement: s1 [file s1]

**Table S2.** Diets and supplements fed to the dogs prior to study enrolment

| <b>Dog</b> | <b>Breed</b>                   | <b>Previous diet</b>               | <b>Supplements</b>      | <b>Treats</b> | <b>Other</b>                                                 |
|------------|--------------------------------|------------------------------------|-------------------------|---------------|--------------------------------------------------------------|
| 1          | Giant Schnauzer                | Royal Canine<br>Giant breed        | Omega 3                 | Yes           | NA                                                           |
| 4          | Broholmer                      | Spanish kibble<br>Diet             | No                      | NA            | Will sometimes eat horse<br>manure and apples                |
| 5          | Mixed breed                    | Pedigree                           | No                      | Yes           | Will sometimes eat horse<br>and cattle manure and<br>carrots |
| 6          | Field Trail Cocker<br>Spaniel  | Olivers Pet Food<br>kibbled diet   | No                      | Yes           | Chewing bone. Occasionally<br>grass and sand                 |
| 7          | Labrador retriever             | Royal Canine<br>Adult              | No                      | Yes           | Occasionally grass.<br>Leftovers                             |
| 8          | Berger Blanc Suisse            | Eukanuba adult<br>Chicken and Rice | No                      | Yes           | No                                                           |
| 9          | Border Collie                  | Royal Canine<br>medium adult       | Salmon oil,<br>vitamins | Yes           | No                                                           |
| 11         | West Highland White<br>Terrier | Eukanuba Westie                    | No                      | Yes           | Leftovers                                                    |
| 15         | Greyhound                      | Changing brands<br>of kibbled diet | Salmon oil              | Yes           | NA                                                           |
| 16         | Border Collie                  | Arion varying<br>between type      | No                      | Yes           | NA                                                           |
| 17         | Mixed breed                    | Eukanuba                           | No                      | Yes           | Leftovers                                                    |
