# Supplementary material for: Alterations in Healthy Adult Canine Faecal Microbiome and Selected Metabolites as a Result of Feeding a Commercial Complete Synbiotic Diet with Enterococcus faecium NCIMB 10415
Source: MDPI journal article supplement (doi:10.3390/ani13010144), 2022-12-30
Supplement: s1 [file s1]

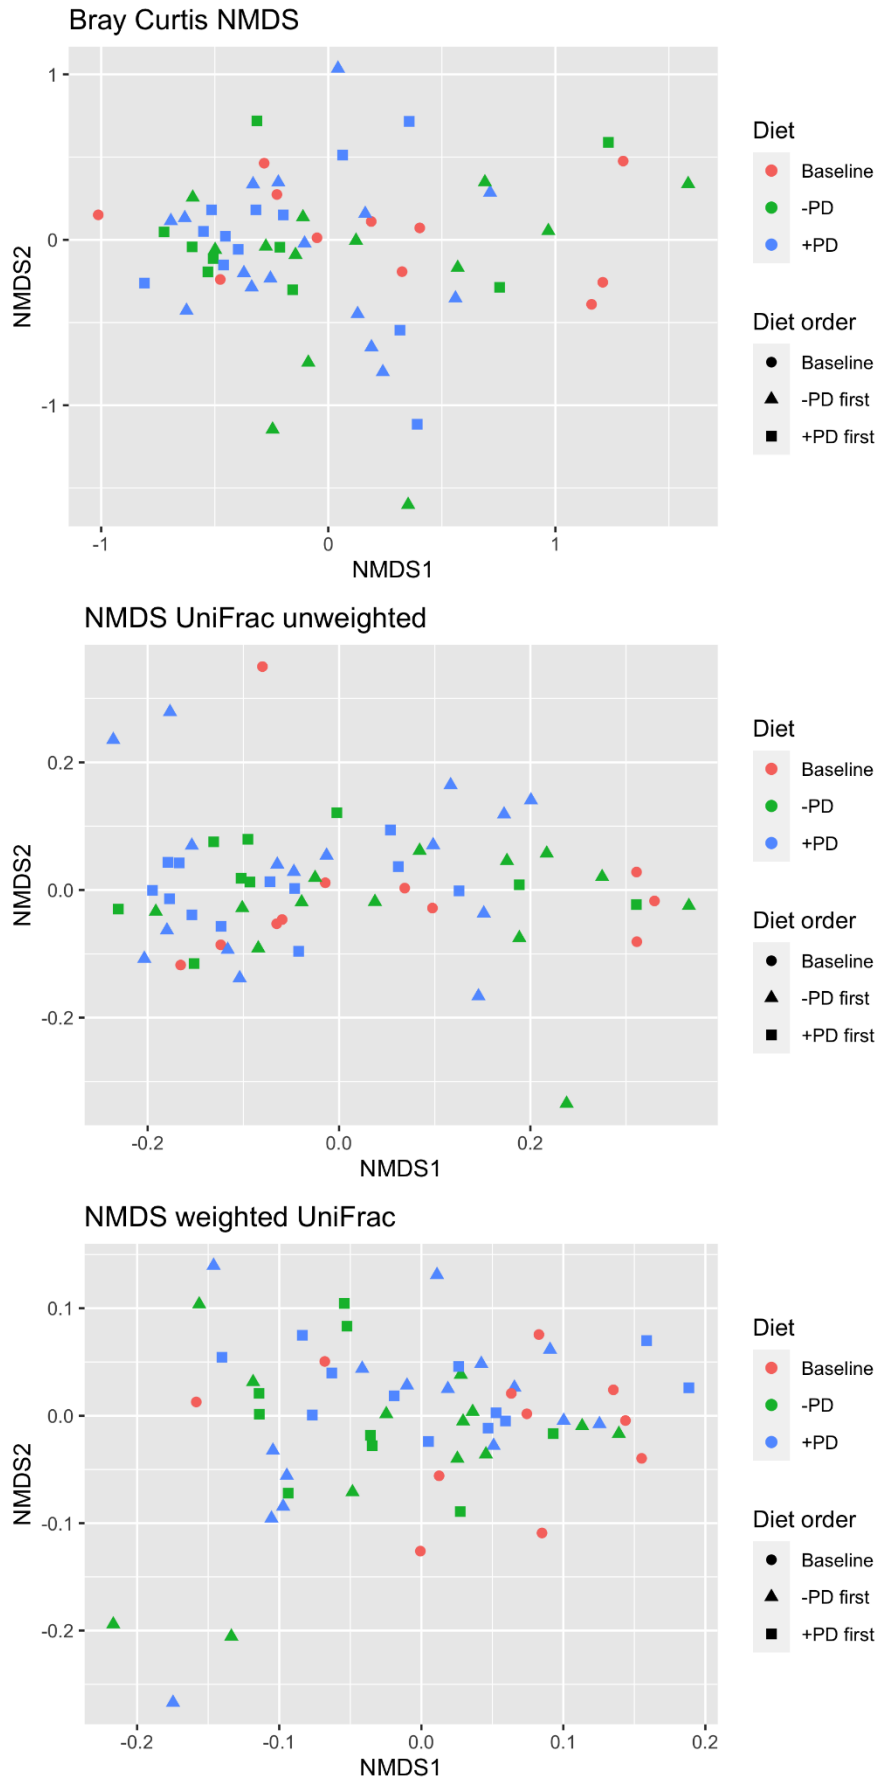

**Figure S1.** Microbiome beta diversity. Boxplot showing the beta diversity (specifically the Bray Curtis, unweighted UniFrac and weighted UniFrac) of the faecal microbiome when the study population was fed a diet manufactured with (blue) or without (green) *Enterococcus faecium* NCIMB 10415 as compared to baseline diversity at inclusion (red). Each colour on the plot identify the individual dog across diet and time.
